# Supplementary material for: A sampler for atmospheric volatile organic compounds by copter unmanned aerial vehicles
Source: Copernicus journal article supplement (doi:10.5194/amt-12-3123-2019), 2019-06-13
Supplement: Supplementary file 1 [file amt-12-3123-2019-supplement.pdf]

Supplement of Atmos. Meas. Tech., 12, 3123–3135, 2019  
<https://doi.org/10.5194/amt-12-3123-2019-supplement>  
© Author(s) 2019. This work is distributed under  
the Creative Commons Attribution 4.0 License.

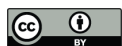

*Supplement of*

## **A sampler for atmospheric volatile organic compounds by copter unmanned aerial vehicles**

**Karena A. McKinney et al.**

*Correspondence to:* Karena A. McKinney ([kamckinn@colby.edu](mailto:kamckinn@colby.edu)) and Scot T. Martin ([scot\\_martin@harvard.edu](mailto:scot_martin@harvard.edu))

The copyright of individual parts of the supplement might differ from the CC BY 4.0 License.

**Description of the calibration standard.**

The thermal desorption cartridge samples were calibrated using a commercial standard from Apel-Riemer Environmental Inc. on a daily basis. The standard contained isoprene,  $\alpha$ -pinene,  $\beta$ -pinene, limonene, myrcene, aromadendrene, methyl vinyl ketone, terpinolene, methacrolein, farnesol, cis-3-hexenyl-acetate, caryophyllene, 3-carene, longifolene, acetaldehyde, methanol, acetone, benzene, toluene, o-xylene, 1,3,5-trimethylbenzene, 1,2,4-trichlorobenzene, 1,3,5-triisopropylbenzene, C<sub>3</sub>-C<sub>10</sub> alkanes, and C<sub>3</sub>-C<sub>6</sub> alkenes.

**Table S1.** Sampler Components.

| <b>Item</b>          | <b>Manufacturer</b>   | <b>Part number</b> | <b>Specification</b>           |
|----------------------|-----------------------|--------------------|--------------------------------|
| Pressure sensor      | NXP                   | MPX4100AP-ND       | 20 to 105 kPa $\pm$ 1.8% FS    |
| Valve manifold       | NResearch Inc.        | 161T102            | 5 sample channels              |
| Valve driver board   | NResearch Inc.        | 161D5X24           |                                |
| Flow sensor          | Omron                 | D6F-P              | 0 to 1 SLPM $\pm$ 5% FS        |
| Micro Diaphragm pump | Parker Hargraves      | E155-11-050        | 0.1 to 0.6 L min <sup>-1</sup> |
| Needle Valve         | Universal Power Conv. | F-2822-51-B85-K-V  |                                |
| Microcontroller      | Arduino               | Uno                |                                |
| Power                | DJI Matrice 600       | TB48S              | 18 VDC, 130 Wh, 2.5 Wh used    |

**Table S2.** Measured VOC masses in Sample and Blank Adsorbent Cartridges.<sup>a</sup> “n.d.” denotes that the VOC mass was below the detection limit of the instrument. <sup>b</sup>Sampling time for the blanks is the duration for the blanks that were uncapped. <sup>c</sup>Sampling volume was calculated under standard conditions (273 K and 1 atm).

| Sample | Local time    | Location (Distance to Tower, m) | Altitude (m) | Sample type | Isoprene (pg) | $\alpha$ -Pinene (pg) | $\beta$ -Pinene (pg) | d-Limonene (pg)   | Athujene (pg) | Tricyclene (pg) | Camphene (pg) | Carene (pg) | Sampling time <sup>b</sup> (min) | Sampling volume <sup>c</sup> (L) |
|--------|---------------|---------------------------------|--------------|-------------|---------------|-----------------------|----------------------|-------------------|---------------|-----------------|---------------|-------------|----------------------------------|----------------------------------|
| 1      | 11:15 - 11:35 | 711 m                           | 75           | Sample      | 6405.1        | 464.1                 | 101.6                | 53.1              | 12.0          | 22.2            | 11.7          | 1.5         | 10.0                             | 1.54                             |
|        |               |                                 |              | Blank       | 327.7         | 27.1                  | 5.2                  | 10.7              | 1.2           | n.d.            | 2.7           | 0.4         | 20.3                             |                                  |
| 2      | 11:15 - 11:35 | Tower top                       | 42           | Sample      | 11601.2       | 1081.4                | 208.2                | n.d. <sup>a</sup> | 8.7           | 57.7            | 0.9           | 3.5         | 20.0                             | 1.76                             |
|        |               |                                 |              | Blank       | 736.8         | 121.6                 | 24.5                 | n.d.              | 3.3           | 1.9             | 5.6           | 13.8        | 20.0                             |                                  |
| 3      | 13:15 - 13:35 | 711 m                           | 100          | Sample      | 12225.6       | 528.4                 | 119.6                | 96.0              | 9.1           | 22.8            | 9.6           | 6.6         | 10.0                             | 1.46                             |
|        |               |                                 |              | Blank       | 392.4         | 57.2                  | 11.0                 | n.d.              | 1.7           | 0.2             | 6.0           | 4.1         | 28.8                             |                                  |
| 4      | 15:15 - 15:35 | 711 m                           | 60           | Sample      | 8275.2        | 492.2                 | 112.4                | n.d.              | 17.3          | 25.7            | 37.1          | 5.6         | 10.0                             | 1.51                             |
|        |               |                                 |              | Blank       | 381.7         | 18.1                  | 4.1                  | n.d.              | n.d.          | n.d.            | 2.9           | 0.3         | 25.9                             |                                  |
| 5      | 15:15 - 15:35 | Tower top                       | 42           | Sample      | 14507.6       | 675.7                 | 127.5                | 8.3               | 5.2           | 42.7            | 7.2           | 6.1         | 20.0                             | 1.76                             |

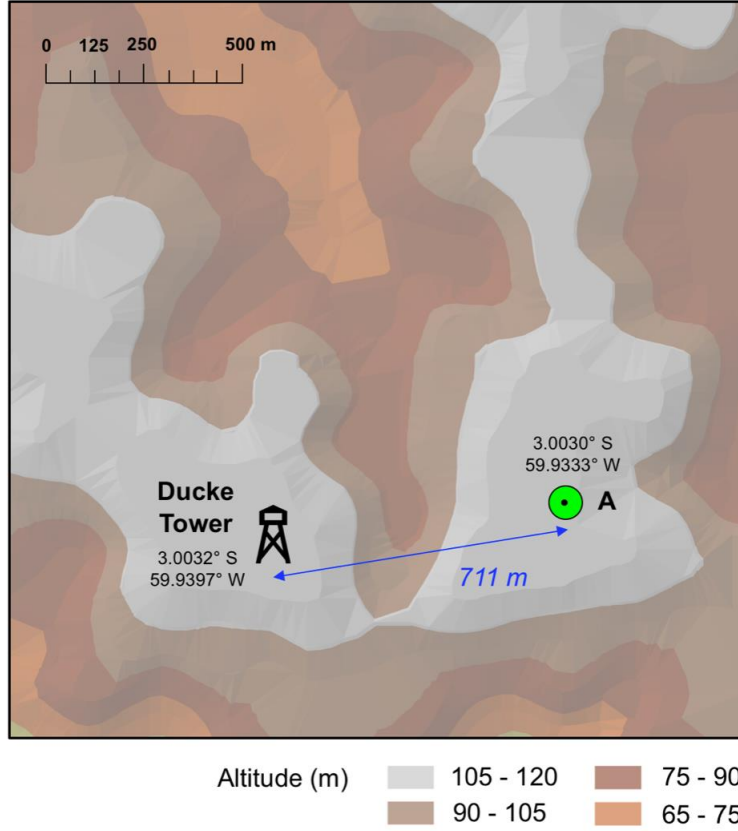

**Figure S1.** Topographical map of the experimental site. Labels indicate the location of the tower and point A, where samples were taken with the UAV.
